# Supplementary material for: Death and Chronic Disease Risk Associated With Poor Life Satisfaction: A Population-Based Cohort Study
Source: PubMed Central journal article supplement — Am J Epidemiol. 2018 Oct 27;188(2):323–31. doi: 10.1093/aje/kwy245 (PMC6357802; doi:10.1093/aje/kwy245), 2018-10-27
Supplement: kwy245_rosella_web_material_final.pdf [file kwy245_rosella_web_material_final.pdf]

**Web Materials for:**

**Mortality and Chronic Disease Risk Associated With Poor Life Satisfaction: A Population-Based Cohort Study**

Laura C. Rosella, Longdi Fu, Emmalin Buajitti and Vivek Goel

**Table of contents:**

Web Figure 1

Web Table 1

**Web Figure 1. Flow chart of study participants from combined Canadian Community Health Care Cycles linked to health administrative data through the Registered Persons Database (RPDB)**

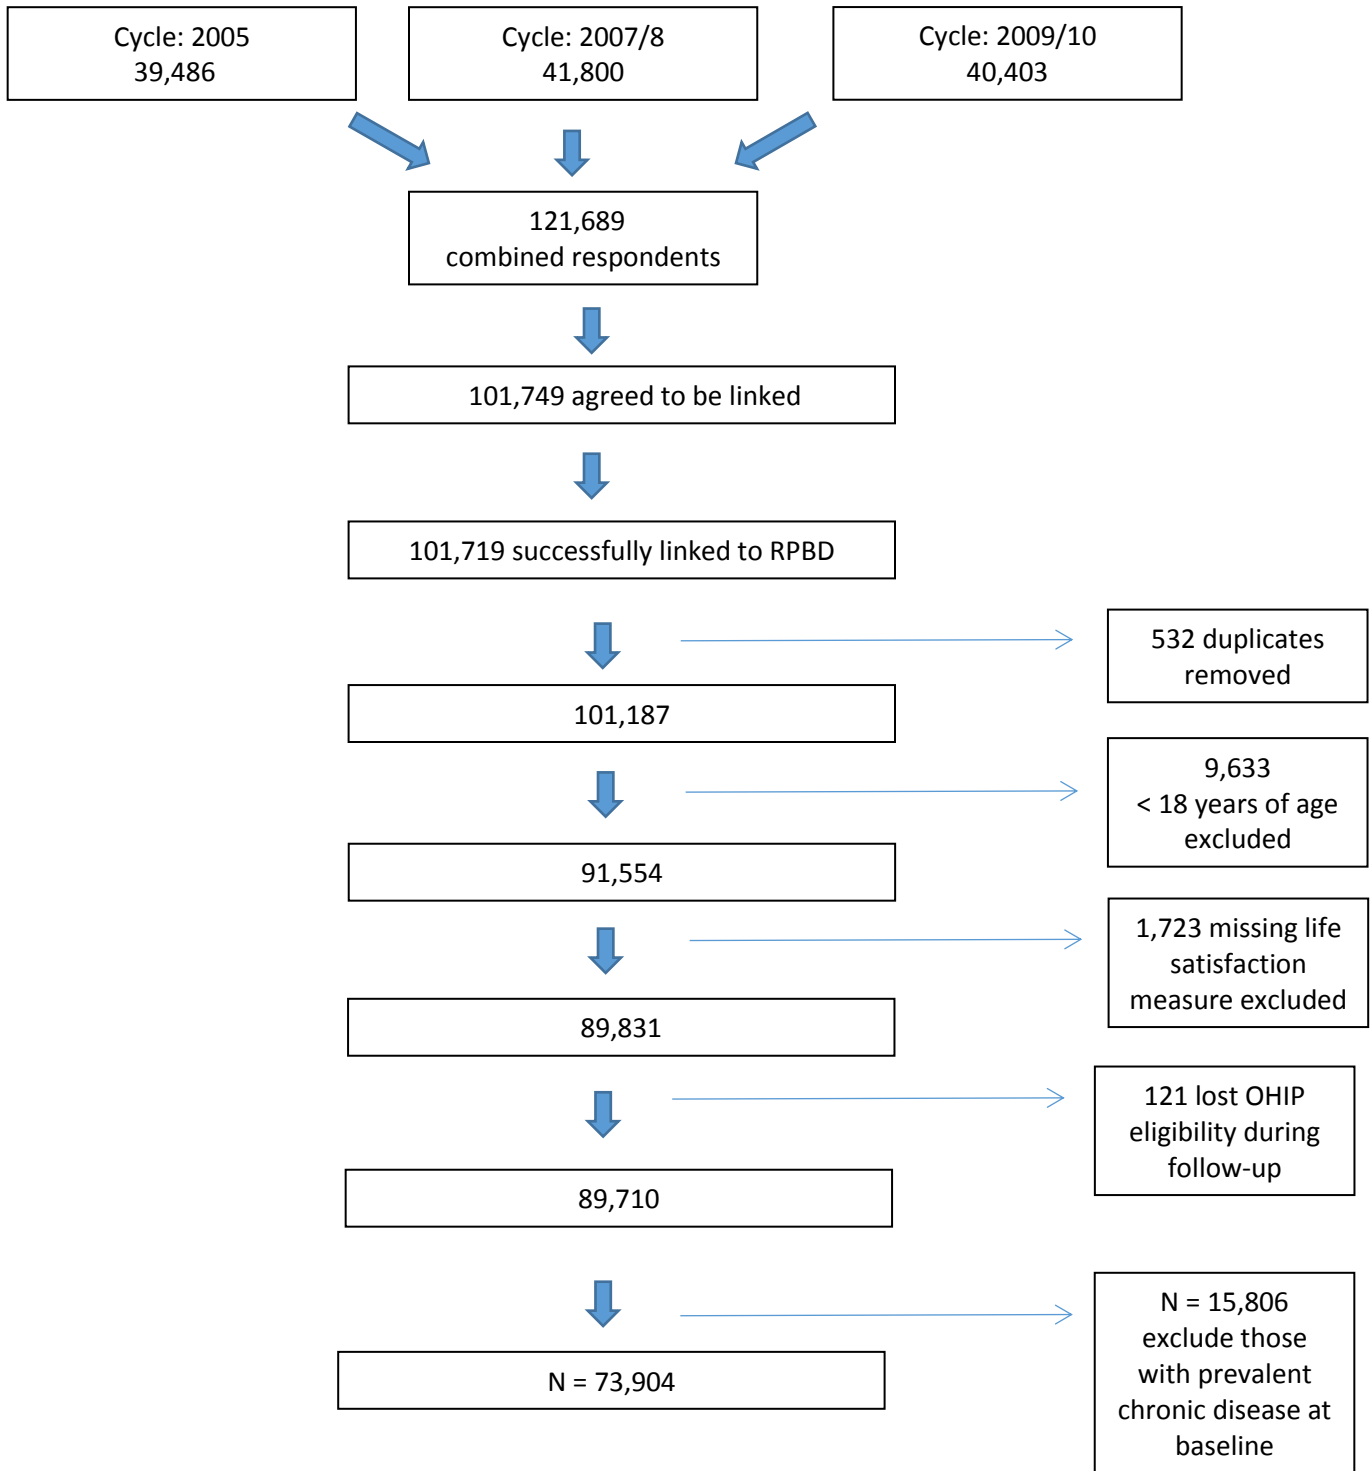

**Web Figure 1.** Cause-specific adjusted hazard ratios and 95% confidence intervals for life satisfaction and of specific chronic disease for 73,904 pooled Canadian Community Health Survey participants surveyed from 2003 to 2007 and followed to 2015 (Ontario, Canada).

|                                       |                  | Risk of Diabetes |            | Risk of Coronary Heart Disease |            | Risk of COPD |            | Risk of Cancer |            |
|---------------------------------------|------------------|------------------|------------|--------------------------------|------------|--------------|------------|----------------|------------|
| Age-sex-cycle adjusted model          |                  |                  |            |                                |            |              |            |                |            |
| Life Satisfaction                     | No. <sup>a</sup> | HR               | 95% CI     | HR                             | 95% CI     | HR           | 95% CI     | HR             | 95% CI     |
| Very satisfied or satisfied           | 67,366           | 1.00             | —          | 1.00                           | —          | 1.00         | —          | 1.00           | —          |
| Neither satisfied nor dissatisfied    | 4,105            | 1.22             | 0.98, 1.51 | 1.48                           | 1.13, 1.96 | 1.41         | 1.08, 1.84 | 0.95           | 0.77, 1.17 |
| Dissatisfied                          | 2,017            | 1.56             | 1.26, 1.93 | 1.91                           | 1.48, 2.46 | 2.43         | 1.84, 3.21 | 1.07           | 0.82, 1.40 |
| Very dissatisfied                     | 416              | 1.99             | 1.28, 3.08 | 2.39                           | 1.06, 5.41 | 3.37         | 1.73, 6.54 | 1.40           | 0.88, 2.22 |
| 2-sided P-Trend                       | —                | 0.0001           |            | 0.0001                         |            | 0.0001       |            | 0.40           |            |
| Minimally adjusted model <sup>b</sup> |                  |                  |            |                                |            |              |            |                |            |
| Life Satisfaction                     | No. <sup>a</sup> | HR               | 95% CI     | HR                             | 95% CI     | HR           | 95% CI     | HR             | 95% CI     |
| Very satisfied or satisfied           | 67,366           | 1.00             | —          | 1.00                           | —          | 1.00         | —          | 1.00           | —          |
| Neither satisfied nor dissatisfied    | 4,105            | 1.08             | 0.87, 1.33 | 1.37                           | 1.04, 1.70 | 1.30         | 0.98, 1.71 | 0.92           | 0.75, 1.14 |
| Dissatisfied                          | 2,017            | 1.29             | 1.03, 1.62 | 1.63                           | 1.26, 2.12 | 2.03         | 1.51, 2.72 | 1.00           | 0.76, 1.32 |
| Very dissatisfied                     | 416              | 1.61             | 1.04, 2.48 | 1.94                           | 0.85, 4.41 | 2.53         | 1.29, 4.99 | 1.26           | 0.79, 2.00 |
| 2-sided P-Trend                       | —                | 0.0001           |            | 0.0001                         |            | 0.0001       |            | 0.77           |            |

Abbreviations: HR: Hazard Ratio; CI: Confidence Interval; COPD: Chronic Obstructive Pulmonary Disease.

<sup>a</sup> Unweighted N

<sup>b</sup> Minimally adjusted model includes age, sex, survey cycle, adjusted diagnostic groups (ADG) comorbidity score, household income quintile, and immigrant status.
